# Supplementary material for: Self-assembled hetero-bimetallic coordination cage and cation-clusters with µ2-Cl bridging using a flexible two-arm ferrocene amide linker
Source: Royal Society of Chemistry journal article supplement (doi:10.1039/b703363j), 2007-01-01
Supplement: b703363j.pdf [file b703363j.pdf]

## Supporting Information

Kai-Ju Wei, Jia Ni, Yong-Shu Xie, Yangzhong Liu and Qing-Liang Liu

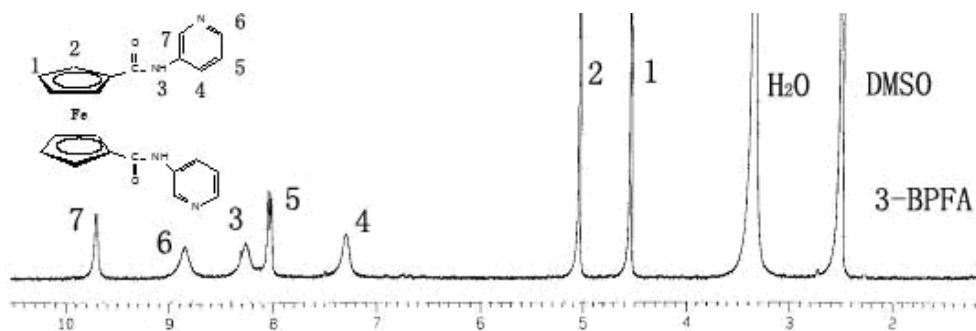

**Scheme 1.**  $^1\text{H}$  NMR spectra of the ligand **3-BPFA** (300 MHz, DMSO; 298K).

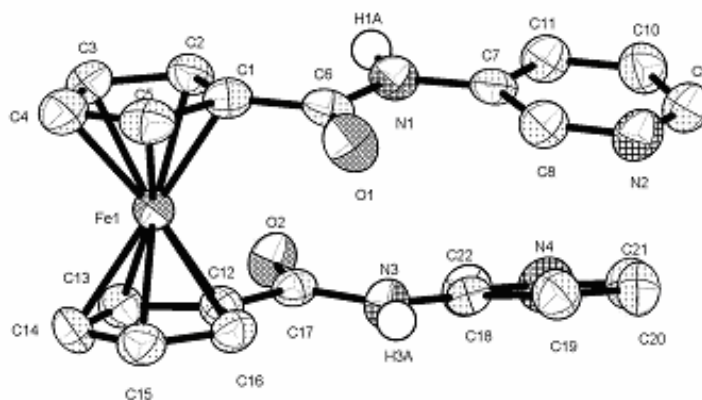

**Figure S1.** ORTEP diagram showing the structure of **3-BPFA** with 50% thermal ellipsoids probability and the atom-labeling scheme. Hydrogen atoms and water molecules have been omitted for clarity.

**Table S1.** Hydrogen bonds for ligand **3-BPFA** [ $\text{\AA}$  and deg.].

| D-H $\cdots$ A                         | d(D-H) | d(H $\cdots$ A) | d(D $\cdots$ A) | $\angle$ (DHA) |
|----------------------------------------|--------|-----------------|-----------------|----------------|
| N(1)-H(1A) $\cdots$ O(2) <sup>#1</sup> | 0.86   | 2.14            | 2.97            | 160            |
| N(3)-H(3A) $\cdots$ N(2) <sup>#2</sup> | 0.86   | 2.29            | 3.11            | 159            |
| O(3)-H(3E) $\cdots$ O(1) <sup>#3</sup> | 0.85   | 2.03            | 2.88            | 179            |
| O(3)-H(3F) $\cdots$ N(4) <sup>#4</sup> | 0.85   | 1.99            | 2.84            | 179            |

Symmetry transformations used to generate equivalent atoms: (#1)  $-x+1, y+1/2, -z+1$ ; (#2)  $-x, y-1/2, -z+1$ ; (#3)  $x+1, y, z$ ; (#4)  $x, y, z-1$ .

**Table S2.** Selected interatomic distances [Å] and angles [°] for complexes **1-3**.

|                                                                                                                                     |            |                                              |            |
|-------------------------------------------------------------------------------------------------------------------------------------|------------|----------------------------------------------|------------|
| <b>Complex 1</b>                                                                                                                    |            |                                              |            |
| Cu-N(2)                                                                                                                             | 2.040(4)   | Cu-N(4) <sup>#2</sup>                        | 2.045(3)   |
| Cu-O(3)                                                                                                                             | 2.186(5)   |                                              |            |
| N(2)-Cu(1)-N(2) <sup>#1</sup>                                                                                                       | 167.4(2)   | N(2)-Cu(1)-N(4) <sup>#2</sup>                | 88.57(13)  |
| N(2) <sup>#1</sup> -Cu(1)-N(4) <sup>#2</sup>                                                                                        | 90.32(13)  | N(2)-Cu(1)-N(4) <sup>#3</sup>                | 90.32(13)  |
| N(2) <sup>#1</sup> -Cu(1)-N(4) <sup>#3</sup>                                                                                        | 88.57(13)  | N(4) <sup>#2</sup> -Cu(1)-N(4) <sup>#3</sup> | 169.85(16) |
| N(2)-Cu(1)-O(3)                                                                                                                     | 96.30(11)  | N(2) <sup>#1</sup> -Cu(1)-O(3)               | 96.30(11)  |
| N(4) <sup>#2</sup> -Cu(1)-O(3)                                                                                                      | 95.08(8)   | N(4) <sup>#3</sup> -Cu(1)-O(3)               | 95.08(8)   |
| Symmetry transformations used to generate equivalent atoms: (#1) -x+5/4, y, -z+1/4; (#2) x, -y+1/4, -z+1/4; (#3) -x+5/4, -y+1/4, z. |            |                                              |            |
| <b>Complex 2</b>                                                                                                                    |            |                                              |            |
| Ni(1)-N(2)                                                                                                                          | 2.172(7)   | Ni(1)-O(3)                                   | 2.203(10)  |
| Ni(1)-N(4) <sup>#2</sup>                                                                                                            | 2.200(8)   | Ni(1)-Cl(1)                                  | 2.615(3)   |
| N(2)-Ni(1)-N(2) <sup>#1</sup>                                                                                                       | 179.0(4)   | N(2)-Ni(1)-N(4) <sup>#2</sup>                | 88.9(3)    |
| N(2) <sup>#1</sup> -Ni(1)-N(4) <sup>#2</sup>                                                                                        | 91.2(3)    | N(2)-Ni(1)-N(4) <sup>#3</sup>                | 91.2(3)    |
| N(2) <sup>#1</sup> -Ni(1)-N(4) <sup>#3</sup>                                                                                        | 88.9(3)    | N(4) <sup>#2</sup> -Ni(1)-N(4) <sup>#3</sup> | 177.8(4)   |
| N(2)-Ni(1)-O(3)                                                                                                                     | 90.49(18)  | N(2) <sup>#1</sup> -Ni(1)-O(3)               | 90.49(18)  |
| N(4) <sup>#2</sup> -Ni(1)-O(3)                                                                                                      | 88.92(19)  | N(4) <sup>#3</sup> -Ni(1)-O(3)               | 88.92(19)  |
| N(2)-Ni(1)-Cl(1)                                                                                                                    | 89.51(18)  | N(2) <sup>#1</sup> -Ni(1)-Cl(1)              | 89.51(18)  |
| N(4) <sup>#2</sup> -Ni(1)-Cl(1)                                                                                                     | 91.08(19)  | N(4) <sup>#3</sup> -Ni(1)-Cl(1)              | 91.08(19)  |
| O(3)-Ni(1)-Cl(1)                                                                                                                    | 180.000(1) | Ni(1)-Cl(1)-Ni(1) <sup>#3</sup>              | 180.000(1) |
| Symmetry transformations used to generate equivalent atoms: (#1) -x+1/4, y, -z+5/4; (#2) x, -y+1/4, -z+5/4; (#3) -x+1/4, -y+1/4, z. |            |                                              |            |
| <b>Complex 3</b>                                                                                                                    |            |                                              |            |
| Co(1)-O(3)                                                                                                                          | 2.125(7)   | Co(1)-N(2)                                   | 2.162(5)   |
| Co(1)-N(4) <sup>#2</sup>                                                                                                            | 2.175(5)   | Co(1)-Cl(1)                                  | 2.5621(12) |
| O(3)-Co(1)-N(2) <sup>#1</sup>                                                                                                       | 90.64(14)  | O(3)-Co(1)-N(2)                              | 90.64(14)  |
| N(2) <sup>#1</sup> -Co(1)-N(2)                                                                                                      | 178.7(3)   | O(3)-Co(1)-N(4) <sup>#2</sup>                | 89.68(14)  |
| N(2) <sup>#1</sup> -Co(1)-N(4) <sup>#2</sup>                                                                                        | 90.80(18)  | N(2)-Co(1)-N(4) <sup>#2</sup>                | 89.20(18)  |
| O(3)-Co(1)-N(4) <sup>#3</sup>                                                                                                       | 89.68(14)  | N(2) <sup>#1</sup> -Co(1)-N(4) <sup>#3</sup> | 89.20(18)  |
| N(2)-Co(1)-N(4) <sup>#3</sup>                                                                                                       | 90.80(18)  | N(4) <sup>#2</sup> -Co(1)-N(4) <sup>#3</sup> | 179.4(3)   |
| O(3)-Co(1)-Cl(1)                                                                                                                    | 180.000(1) | N(2) <sup>#1</sup> -Co(1)-Cl(1)              | 89.36(14)  |
| N(2)-Co(1)-Cl(1)                                                                                                                    | 89.36(14)  | N(4) <sup>#2</sup> -Co(1)-Cl(1)              | 90.32(14)  |
| N(4) <sup>#3</sup> -Co(1)-Cl(1)                                                                                                     | 90.32(14)  | Co(1) <sup>#3</sup> -Cl(1)-Co(1)             | 180.0      |
| Symmetry transformations used to generate equivalent atoms: (#1) -x+9/4, y, -z+1/4; (#2) x, -y+5/4, -z+1/4; (#3) -x+9/4, -y+5/4, z. |            |                                              |            |

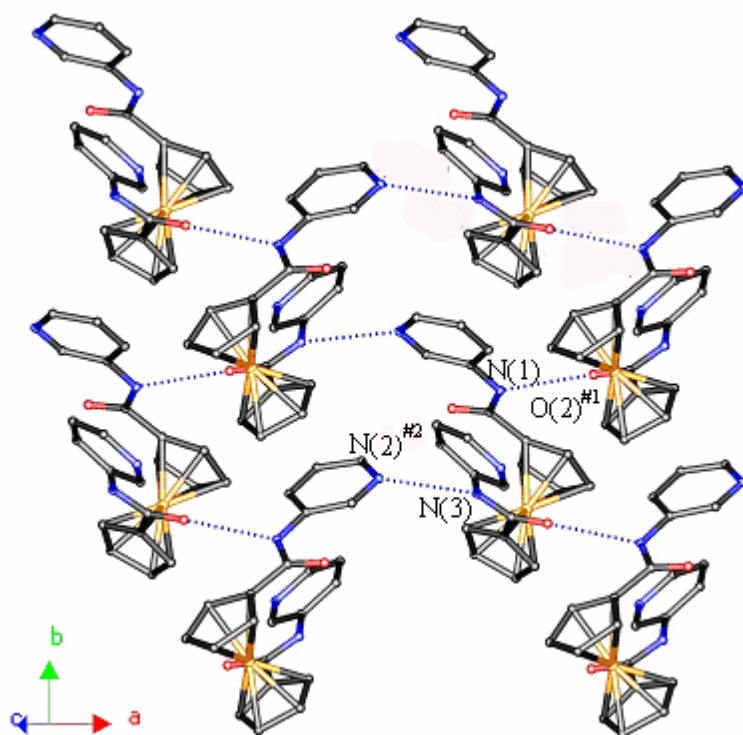

**Figure S2.** View of the supramolecular adduct **3-BPFA**, showing the hydrogen bonds between N-H donors on **3-BPFA** and the N acceptors on the other moiety. Symmetry transformations used to generate equivalent atoms: (#1)  $-x+1, y+1/2, -z+1$ ; (#2)  $-x, y-1/2, -z+1$ .

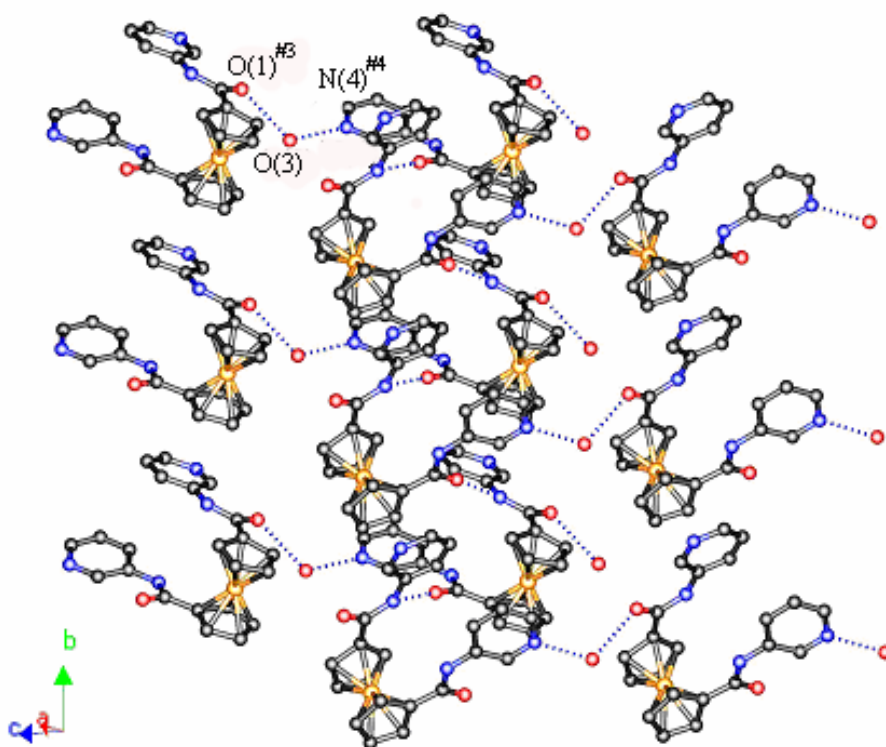

**Figure S3.** View of the packed structure along *bc* plane in compound **3-BPFA**. Symmetry transformations used to generate equivalent atoms: (#3)  $x+1, y, z$ ; (#4)  $x, y, z-1$ .

**Table S3.** Hydrogen bonds for **1** [Å and deg.].

| D-H...A                         | d(D-H) | d(H...A) | d(D...A) | ∠ (DHA) |
|---------------------------------|--------|----------|----------|---------|
| N(3)-H(3A)···O(1)               | 0.86   | 2.17     | 2.84     | 134     |
| N(1)-H(1A)···O(7) <sup>#1</sup> | 0.86   | 2.17     | 2.96     | 154     |
| O(3)-H(3B)···O(8) <sup>#2</sup> | 0.82   | 1.94     | 2.71     | 156     |
| O(8)-H(8A)···O(2) <sup>#3</sup> | 0.82   | 2.00     | 2.77     | 144     |

Symmetry transformations used to generate equivalent atoms: (#1) x, y, z-1; (#2) -x+5/4, y, -z+1/4; (#3) x-1/2, y+1/2, z.

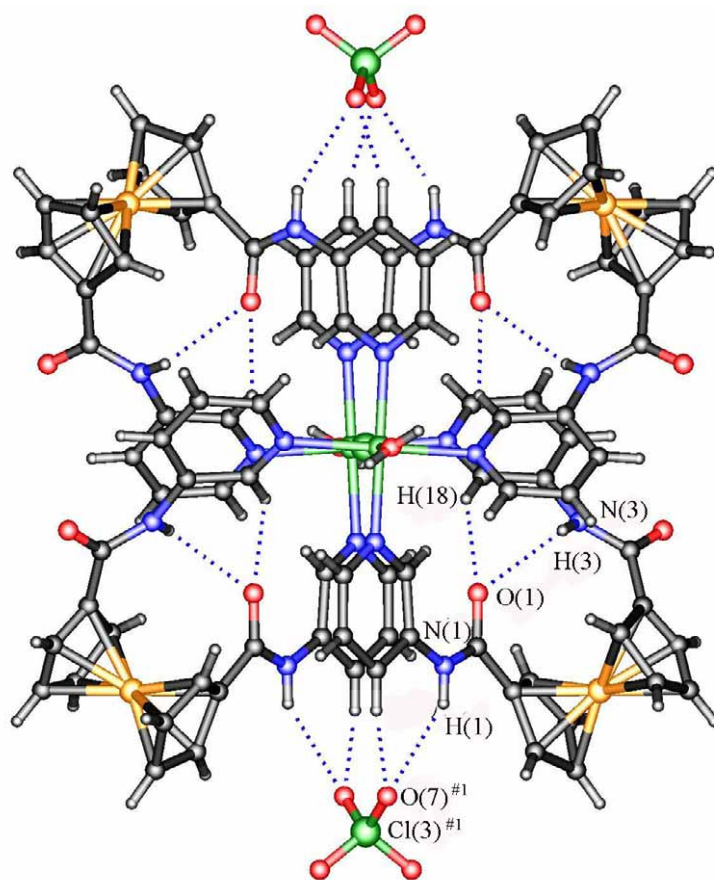

**Figure S4.** Top view of the pseudo-capsule  $[\text{Ni}_2(3\text{-BPFA})_4(\mu\text{-Cl})_2(\text{H}_2\text{O})_2](\text{ClO}_4)_3$ , showing multiple N-H...O and C-H...O H-bonding interactions. A  $\text{ClO}_4^-$  anion is omitted for clarity. Symmetry transformations used to generate equivalent atoms: (#1): -x+1/2, -y+1, -z+3/2.

**Table S4.** Hydrogen bonds for **2** [Å and deg.].

| D-H...A                          | d(D-H) | d(H...A) | d(D...A) | ∠ (DHA) |
|----------------------------------|--------|----------|----------|---------|
| N(3)-H(3)···O(1)                 | 0.86   | 2.44     | 3.04     | 127     |
| C(18)-H(18)···O(1)               | 0.93   | 2.37     | 3.13     | 139     |
| C(15)-H(15)···O(7) <sup>#1</sup> | 0.93   | 2.51     | 3.28     | 140     |
| N(1)-H(1)···O(7) <sup>#1</sup>   | 0.86   | 2.50     | 3.27     | 150     |

Symmetry transformations used to generate equivalent atoms: (#1): -x+1/2, -y+1, -z+3/2

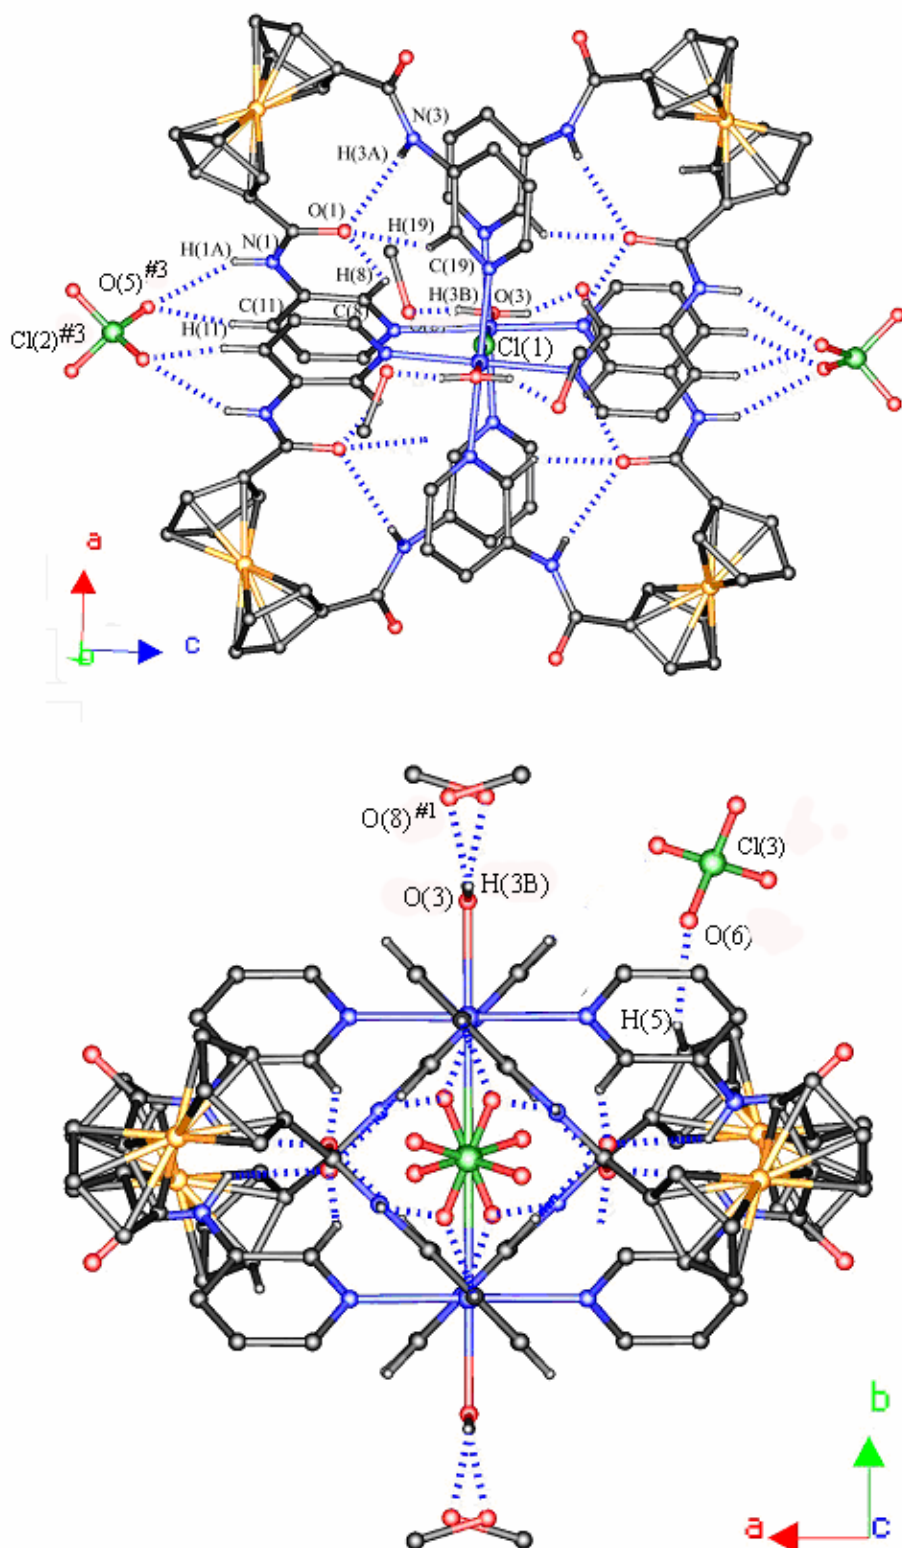

**Figure S5.** Top and side views of the cage  $[\text{Co}_2(3\text{-BPFA})_4(\mu\text{-Cl})_2(\text{H}_2\text{O})_2](\text{ClO}_4)_3 \cdot 4\text{CH}_3\text{OH}$ , showing multiple intramolecular N-H $\cdots$ O hydrogen-bonding interactions and intermolecular N-H $\cdots$ O and O-H $\cdots$ O hydrogen-bonding interactions. Hydrogen atoms are omitted for clarity.

Symmetry transformations used to generate equivalent atoms: (#1):  $x+1, y, z$ ; (#3):  $x+1, y, z-1$ .

**Table S5.** Hydrogen bonds for **3** [Å and deg.].

| D-H...A                          | d(D-H) | d(H...A) | d(D...A) | ∠ (DHA) |
|----------------------------------|--------|----------|----------|---------|
| N(3)-H(3A)···O(1)                | 0.86   | 2.23     | 2.87     | 132     |
| C(5)-H(5)···O(6)                 | 0.93   | 2.49     | 3.37     | 157     |
| C(8)-H(8)···O(1)                 | 0.93   | 2.11     | 2.73     | 123     |
| C(19)-H(19)···O(1)               | 0.93   | 2.25     | 3.03     | 142     |
| O(3)-H(3B)···O(8) <sup>#1</sup>  | 0.82   | 2.07     | 2.77     | 143     |
| O(8)-H(8B)···O(2) <sup>#2</sup>  | 0.82   | 2.59     | 3.29     | 85      |
| N(1)-H(1A)···O(5) <sup>#3</sup>  | 0.86   | 2.30     | 3.08     | 150     |
| C(11)-H(11)···O(5) <sup>#3</sup> | 0.93   | 2.46     | 3.23     | 140     |

Symmetry transformations used to generate equivalent atoms: (#1):  $x+1, y, z$ ; (#2):  $x-1/2, y-1/2, z$ ; (#3):  $x+1, y, z-1$ .

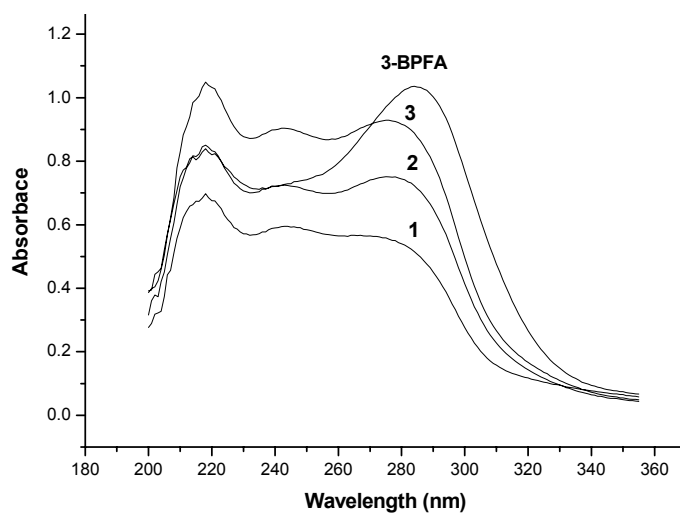

**Figure S6.** UV-visible absorption spectra at ambient temperature in MeOH ( $4 \times 10^{-5}$  M) for the ligand **3-BPFA** and in MeOH ( $1 \times 10^{-5}$  M) complexes **1-3**.

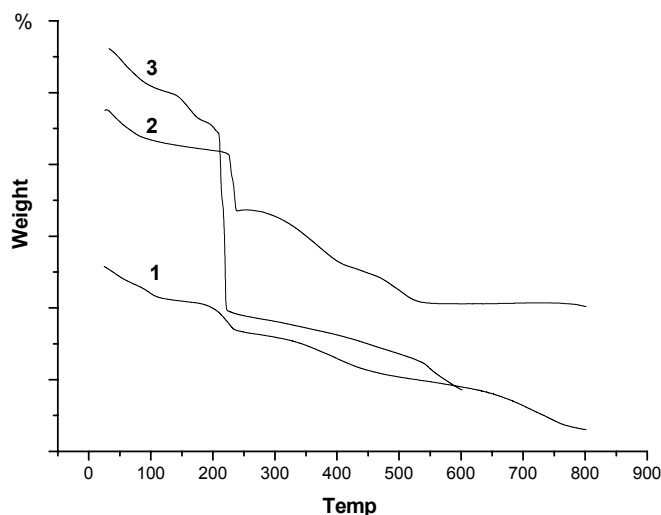

**Figure S7.** Thermogravimetric analysis of complexes **1-3**.

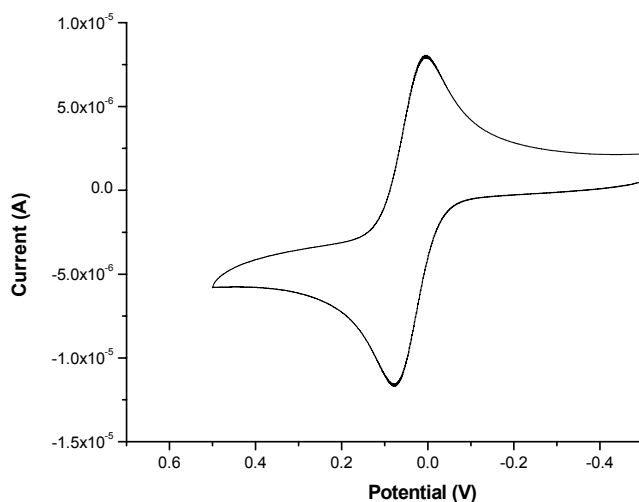

**Figure S8.** Cyclic voltammogram of **Ferrocene** in acetonitril/0.1 M tetrabutylammonium hexafluorophosphate; concentration of **Ferrocene**:  $0.5 \times 10^{-3}$  M. Scan rate of 50 mV/s.

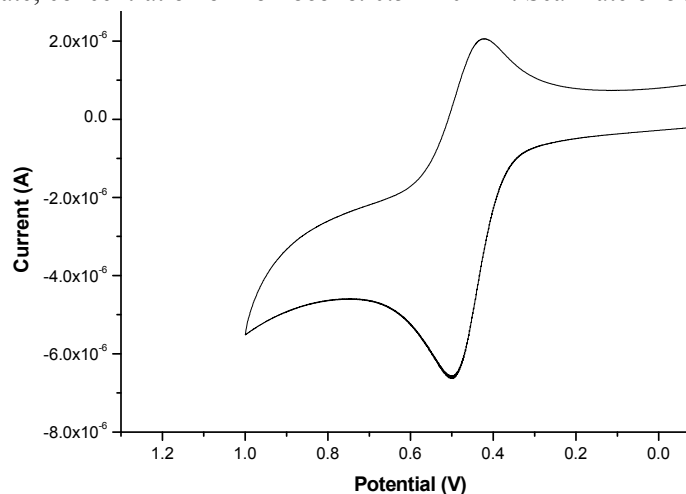

**Figure S9.** Cyclic voltammogram of **3-BPFA** in acetonitril/0.1 M tetrabutylammonium hexafluorophosphate; concentration of **3-BPFA**:  $0.5 \times 10^{-3}$  M. Scan rate of 50 mV/s.

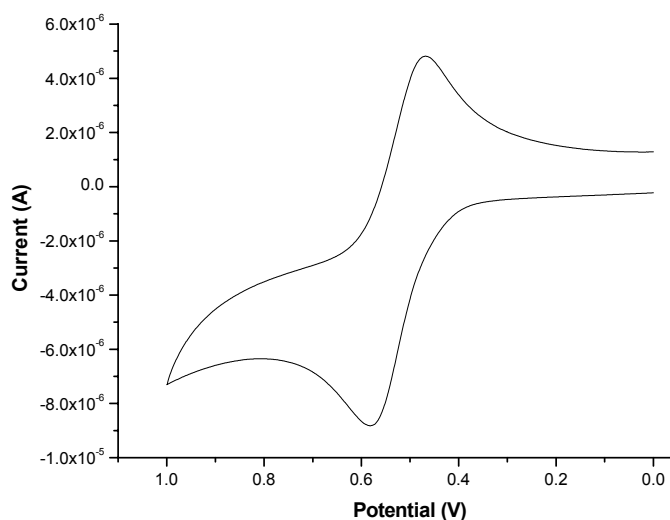

**Figure S10.** Cyclic voltammogram of **1** in acetonitril/0.1 M tetrabutylammonium

hexafluorophosphate; concentration of **1**:  $0.5 \times 10^{-3}$  M. Scan rate of 50 mV/s.

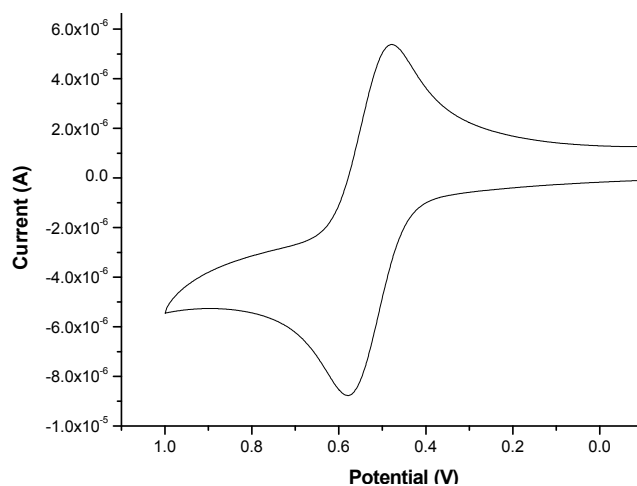

**Figure S11.** Cyclic voltammogram of **2** in acetonitrile/0.1 M tetrabutylammonium hexafluorophosphate; concentration of **2**:  $0.5 \times 10^{-3}$  M. Scan rate of 50 mV/s.

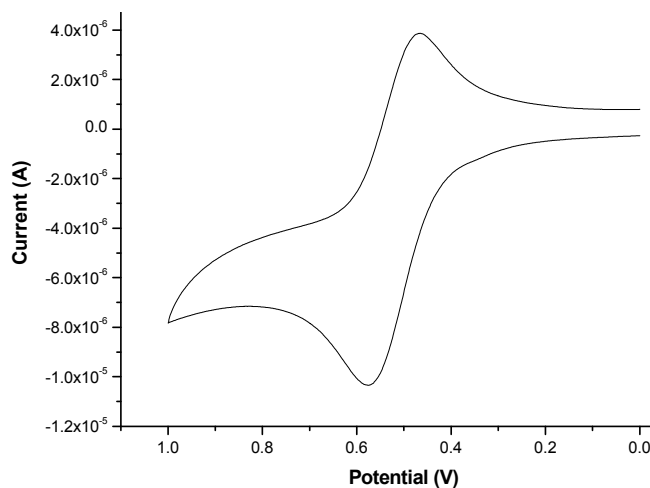

**Figure S12.** Cyclic voltammogram of **3** in acetonitrile/0.1 M tetrabutylammonium hexafluorophosphate; concentration of **3**:  $0.5 \times 10^{-3}$  M. Scan rate of 50 mV/s.
